# Supplementary material for: Choroidal Vascular Abnormalities by Ultra-widefield Indocyanine Green Angiography in Polypoidal Choroidal Vasculopathy
Source: PubMed Central journal article supplement — Invest Ophthalmol Vis Sci. 2021 Feb 19;62(2):29. doi: 10.1167/iovs.62.2.29 (PMC7900872; doi:10.1167/iovs.62.2.29), 2021-02-19
Supplement: iovs-62-2-29_s001.pdf [file iovs-62-2-29_s001.pdf]

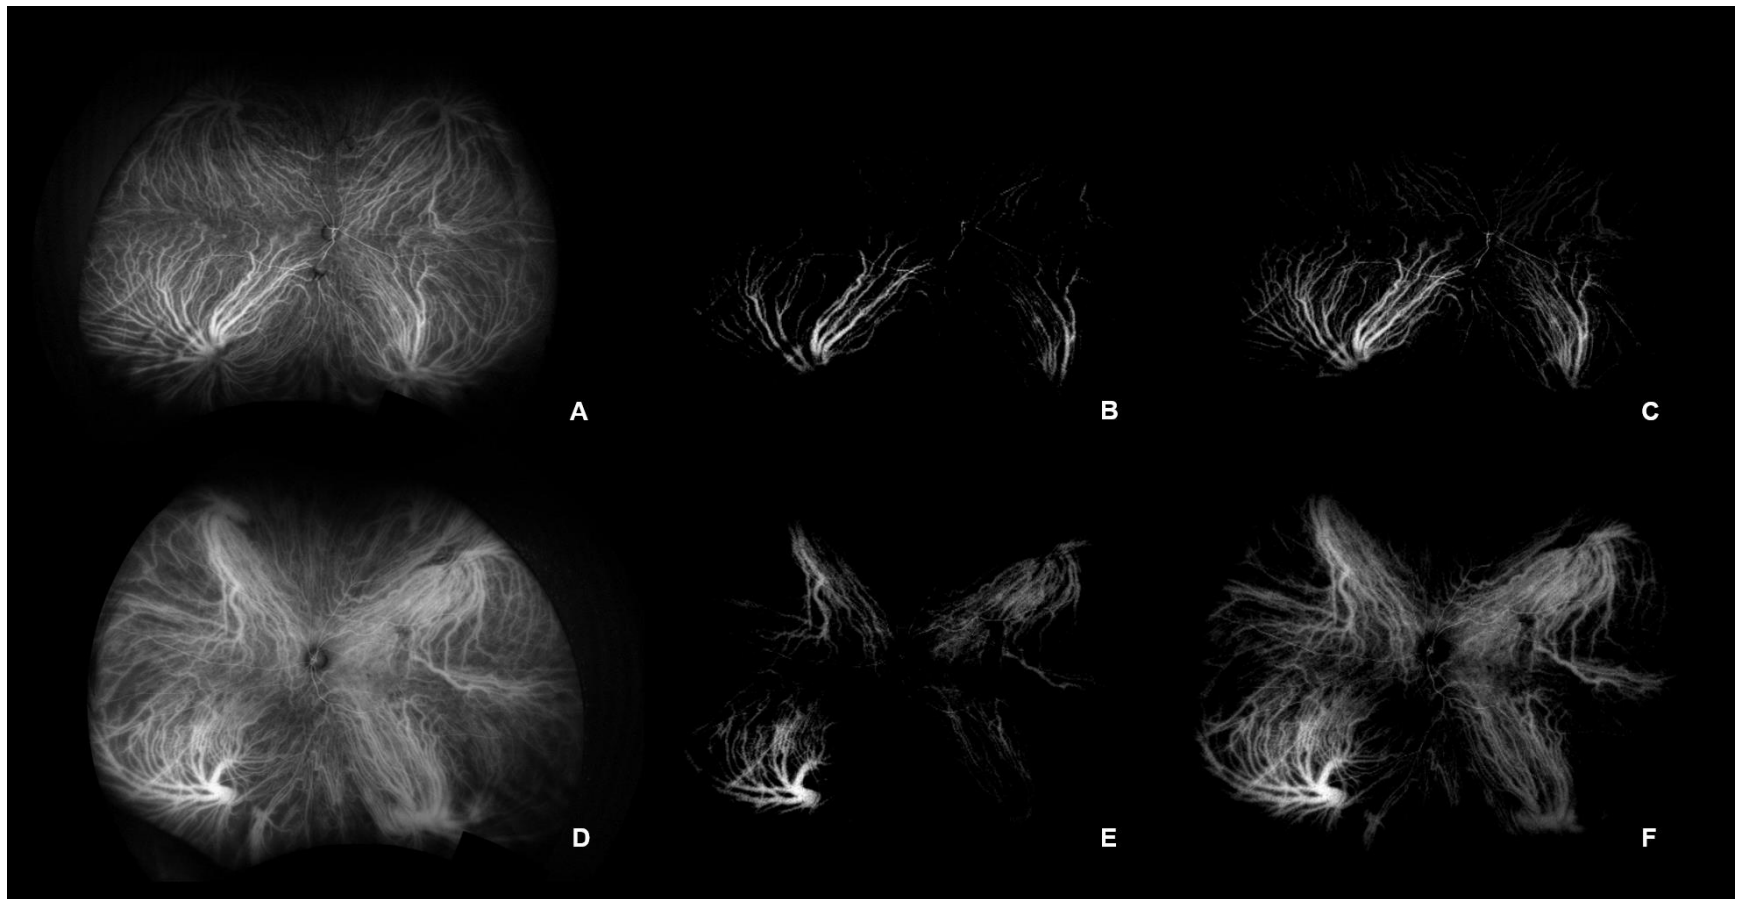

**Supplementary Figure 1.** Image processing procedure for detecting vortex vein engorgement. (A, D) Representative middle phase ultra-widefield indocyanine green angiography images after stereographic projection. (B, C, E, F) To determine number of engorged vortex vein, the brightness of images was adjusted from dark to bright until the medium sized choroidal vessels in the inter-vortex space were visible.
